# Supplementary material for: Phosphazene superbase catalyzed ring-opening polymerization of cyclotetrasiloxane toward copolysiloxanes with high diphenyl siloxane content
Source: Royal Society of Chemistry journal article supplement (doi:10.1039/c9py00247b), 2019-01-01
Supplement: c9py00247b1.pdf [file c9py00247b1.pdf]

**Supporting Information for Manuscript Entitled**

**Phosphazene Superbase Catalyzed Ring-Opening  
Polymerization of Cyclotetrasiloxane toward  
Copolysiloxanes with High Diphenyl Siloxane Content**

Jinfeng Shi,<sup>a</sup> Na Zhao,<sup>a</sup> Shuang Xia,<sup>b</sup> Shaofeng Liu,<sup>\*,a</sup> and Zhibo Li<sup>\*,a</sup>

<sup>a</sup>Key Laboratory of Biobased Polymer Materials, Shandong Provincial Education Department; College of Polymer Science and Engineering, Qingdao University of Science and Technology, Qingdao 266042, China

<sup>b</sup>Institute of Chemical Materials, China Academy of Engineering Physics, Mianyang 621900, China

\*Corresponding Author: E-mail: [shaofengliu@qust.edu.cn](mailto:shaofengliu@qust.edu.cn) and [zbli@qust.edu.cn](mailto:zbli@qust.edu.cn)

**Table S1.** ROP of D<sub>4</sub> catalyzed by *t*-BuP<sub>2</sub> and BnOH.<sup>a</sup>

| run | initiator | M/B/I   | <i>T</i><br>(°C) | time<br>(min) | con % <sup>b</sup> | <i>M</i> <sub>n,GPC</sub> <sup>c</sup><br>(kg mol <sup>-1</sup> ) | <i>D</i> <sup>c</sup> |
|-----|-----------|---------|------------------|---------------|--------------------|-------------------------------------------------------------------|-----------------------|
| 1   | BnOH      | 100/1/1 | 30               | 1             | 0                  | -                                                                 | -                     |
| 2   | BnOH      | 100/1/1 | 30               | 60            | 37                 | 26.9                                                              | 2.02                  |

<sup>a</sup> Conditions: *t*-BuP<sub>2</sub> 0.05 mmol; M/B/I = D<sub>4</sub>/*t*-BuP<sub>2</sub>/initiator; the base and initiator were mixed firstly in 1 mL toluene, followed by addition of D<sub>4</sub>. <sup>b</sup> Determined by <sup>1</sup>H NMR. <sup>c</sup> Determined by GPC at 40 °C in THF relative to polystyrene standards.

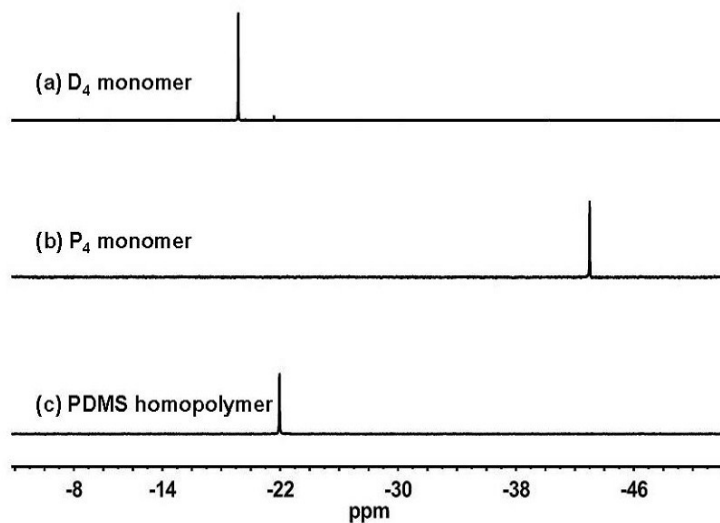

**Figure S1.**  $^{29}\text{Si}$  NMR spectra of the  $\text{D}_4$  monomer (a),  $\text{P}_4$  monomer (b) and PDMS homopolymer (c).

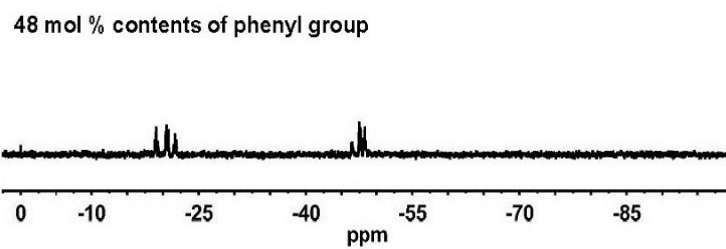

**Figure S2.**  $^{29}\text{Si}$  NMR spectrum of copolymer in Table 2 run 5.

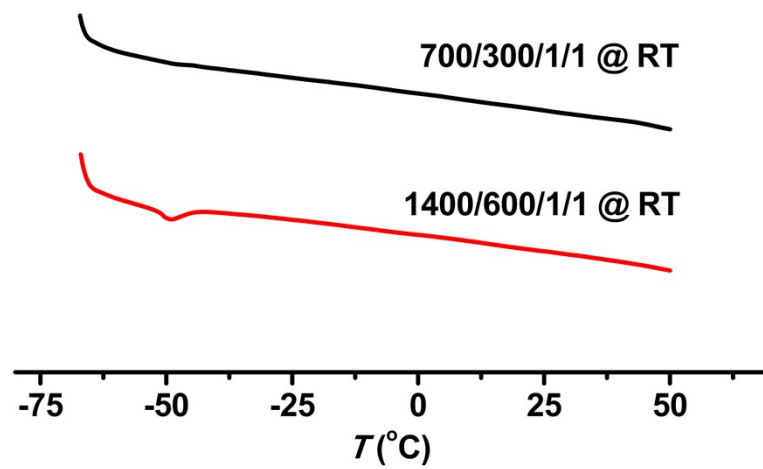

**Figure S3.** DSC thermograms of the second heating run of the PDMS-*ran*-PDPS copolymers with different diphenyl group contents (Table 2, runs 9 and 10).

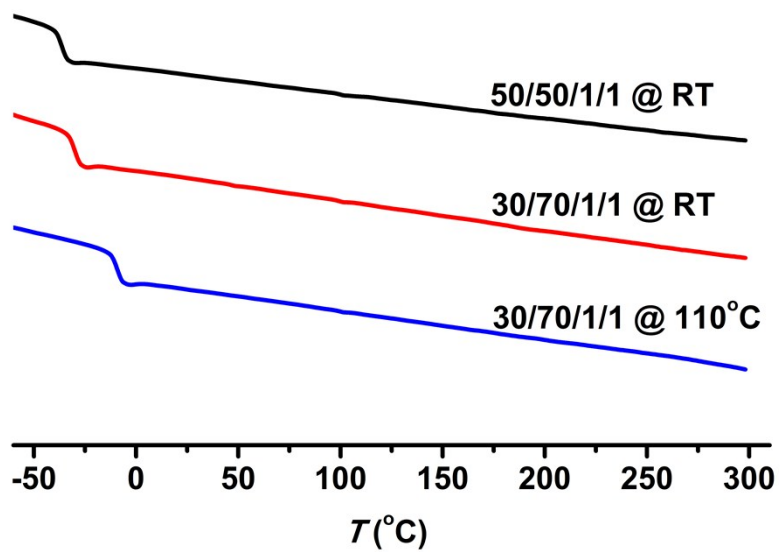

**Figure S4.** DSC thermograms of the second heating run of the PDMS-*ran*-PDPS copolymers with different diphenyl group contents (Table 2, runs 4-6).
